# Supplementary material for: The transcription factor PHR1 regulates lipid remodeling and triacylglycerol accumulation in Arabidopsis thaliana during phosphorus starvation
Source: PubMed Central journal article supplement (PMC4378627; doi:10.1093/jxb/eru535), 2015-02-13

**The transcription factor PHR1 regulates lipid remodeling and triacylglycerol accumulation in *Arabidopsis thaliana* during phosphorus starvation.**

Bikram Datt Pant, Asdrubal Burgos, Pooja Pant, Alvaro Cuadros-Inostroza, Lothar Willmitzer, Wolf-Rüdiger Scheible

SUPPLEMENTARY DATA

**Supplementary Figure S1.** Effect of P starvation on the relative abundance of glycerolipid species in shoots and roots of *Arabidopsis*.

Values shown represent median relative intensities corresponding to shoots (A) and roots (B) of wild-type plants growing at 3mM Pi (white bars) and 0mM Pi (gray bars), and of *phr1* plants at 0mM Pi (black bars). Error bars represent the interval between the 1<sup>st</sup> and the 3<sup>rd</sup> quartiles.

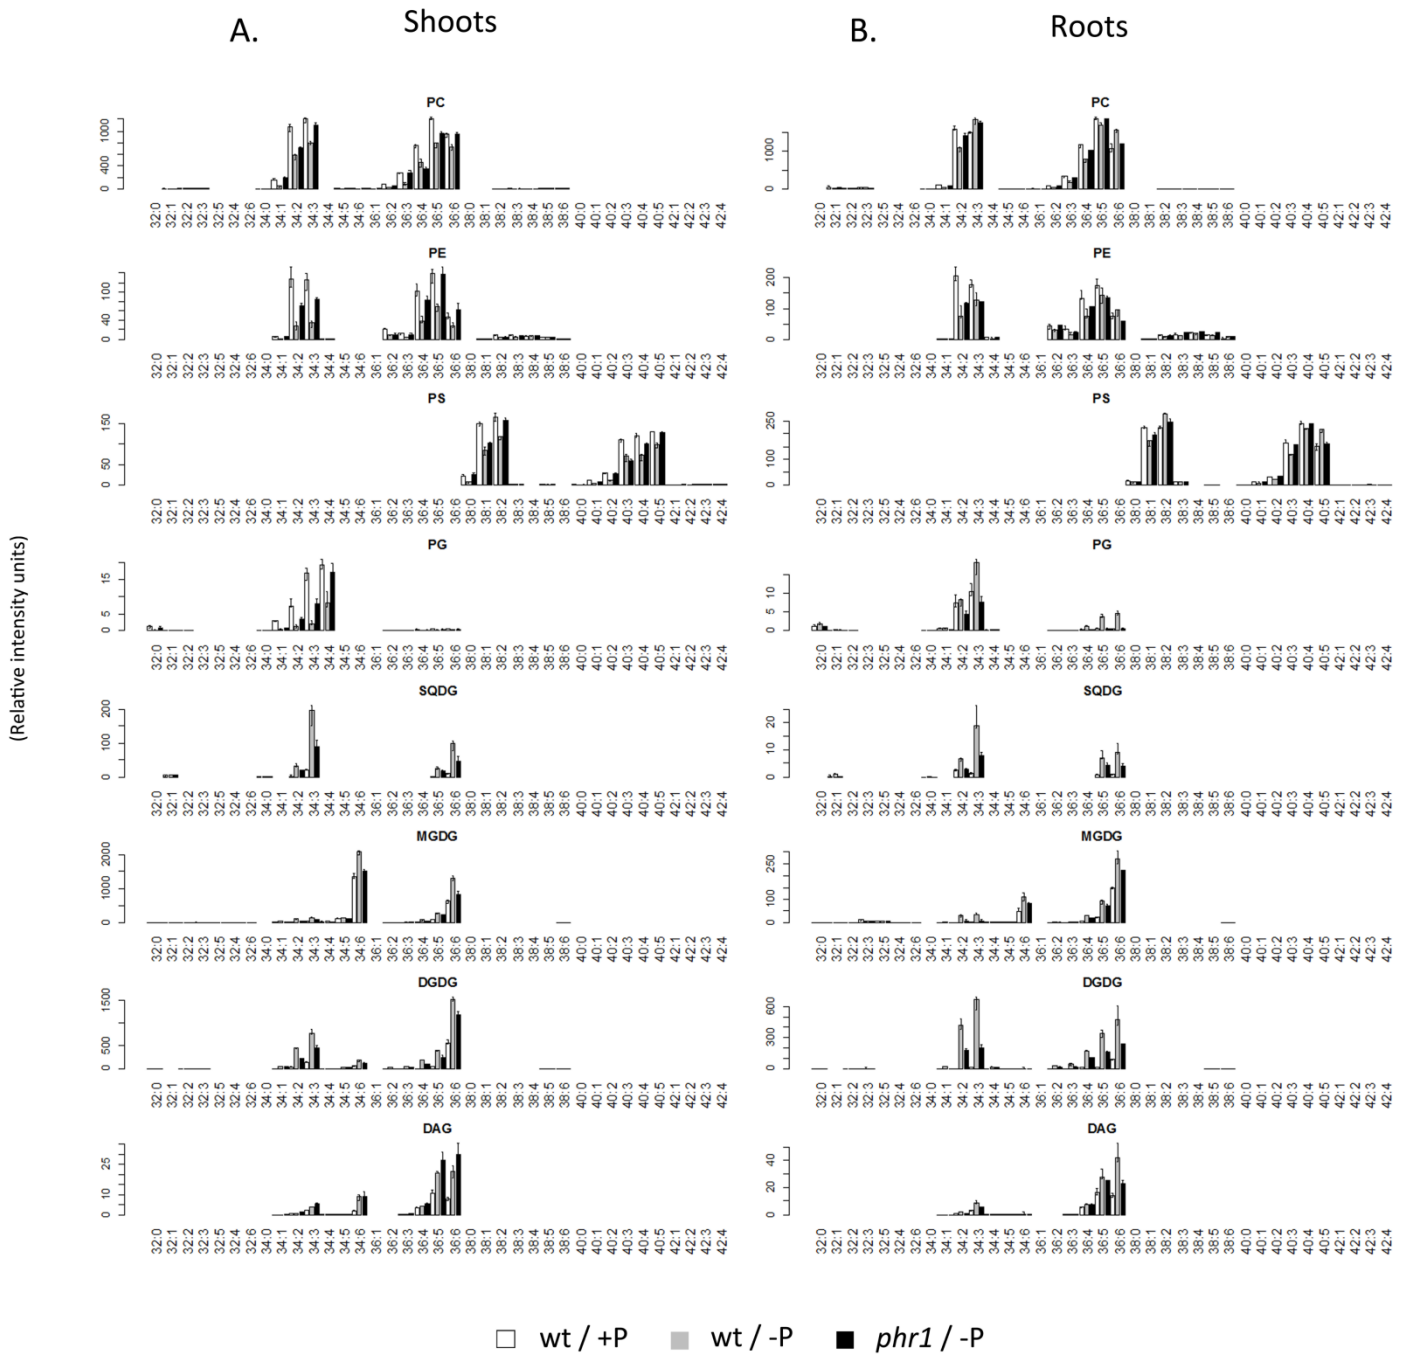

**Supplementary Figure S2.** Effect of *pho2* and *miR399d-OX* genotypes in lipid composition under P starvation.

The mutant *phr1* is included for comparison. Plotted values represent the sum of normalized intensities of all the species belonging to each class. Error bars represent the interval between the 1<sup>st</sup> and the 3<sup>rd</sup> quartiles. Statistical groups calculated with pairwise T-tests are indicated with letters (a-d). Color code: wild type (white), *pho2* (blue), *miR399d-OX* (red), and *phr1* (orange); 3mM Pi (+P, solid bars) and 0mM Pi (-P, dashed bars).

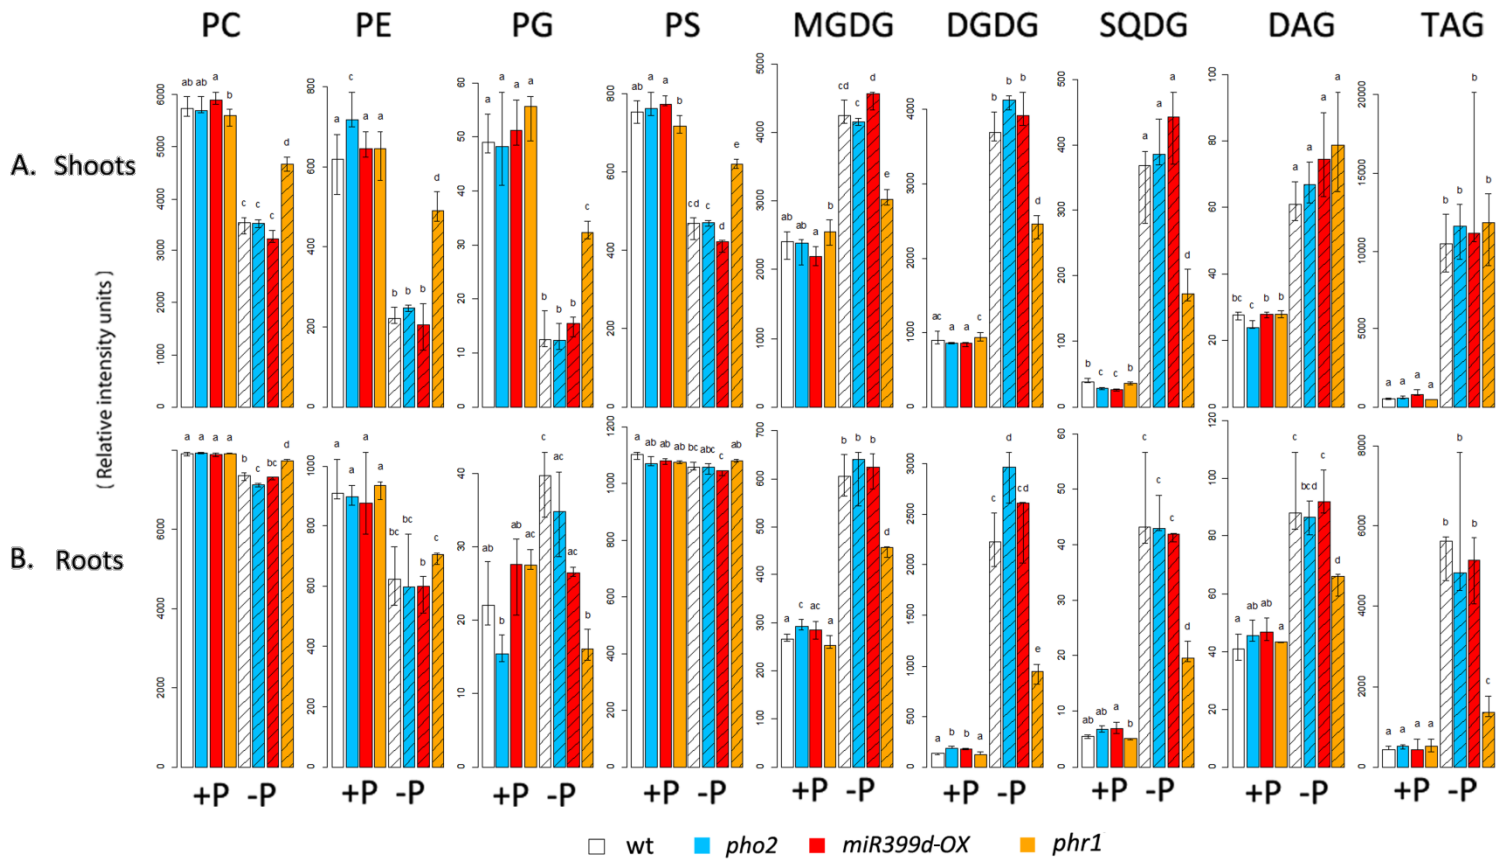

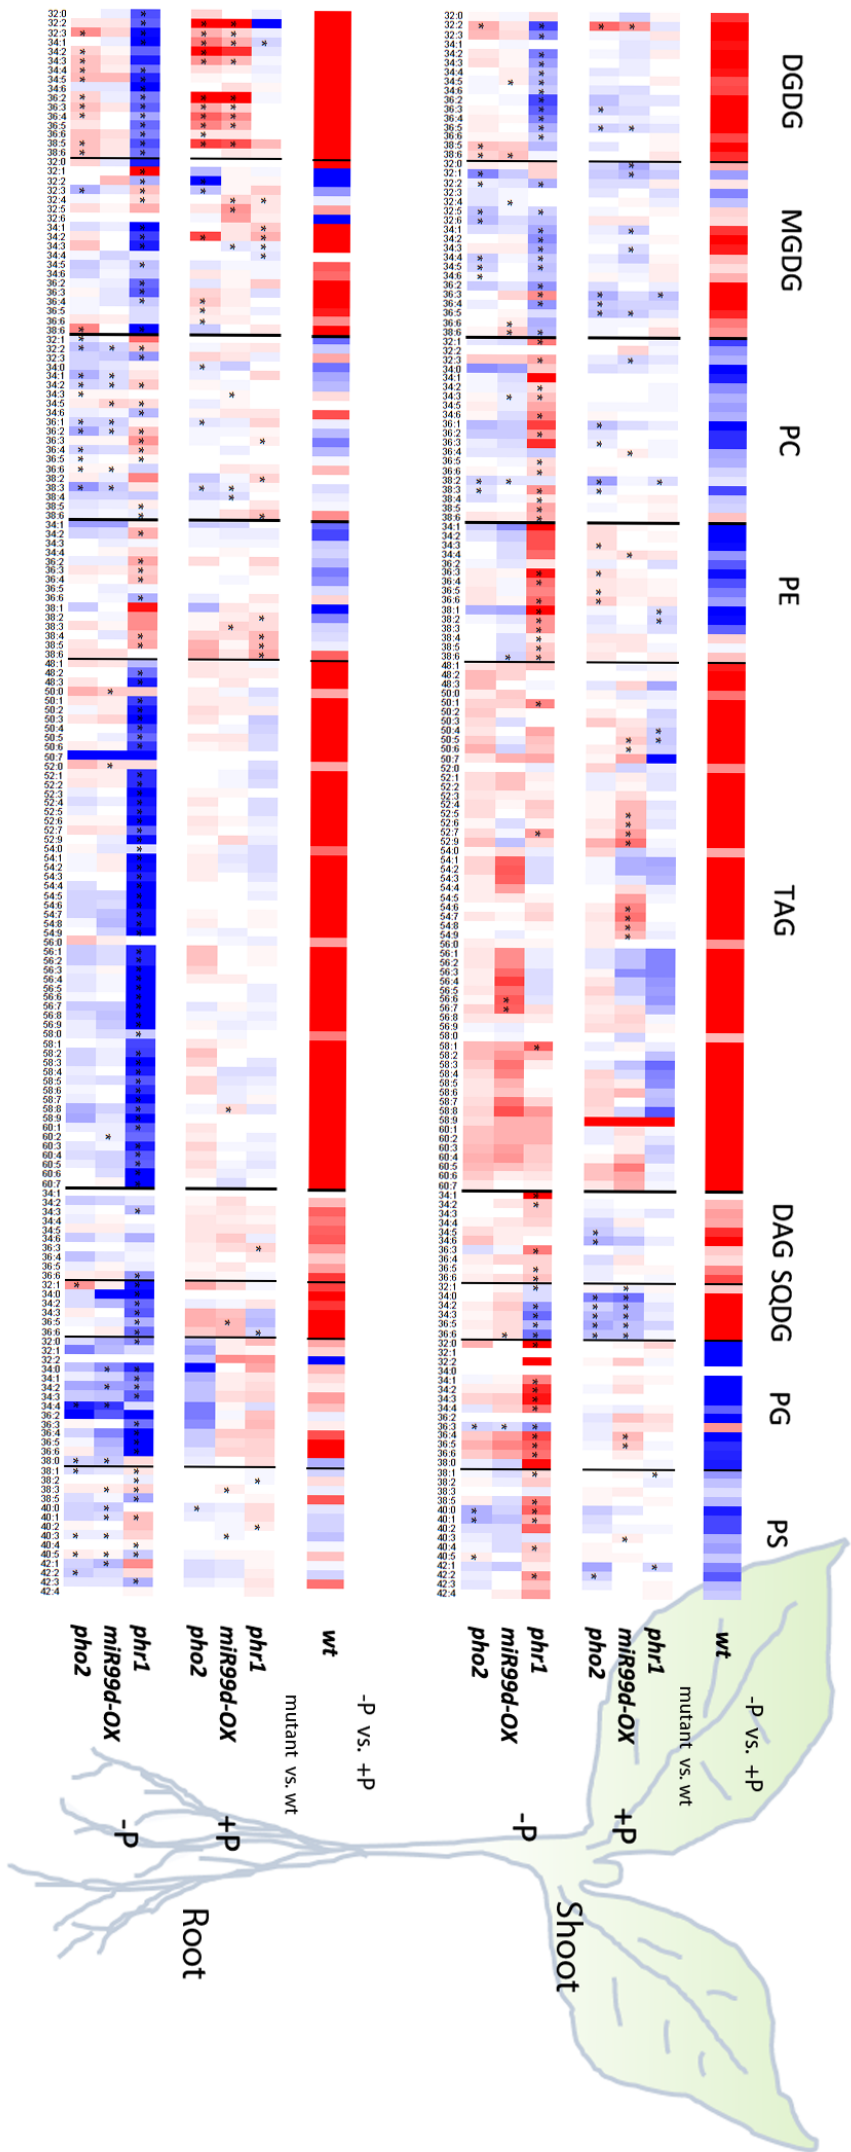

**Supplementary Figure S3.** Changes caused by *phr1*, *mirR99d-OX* and *pho2* genotypes at the species level.

Heatmap colors indicate fold changes. Significant changes relative to the wild type are denoted with asterisks (T-test p-value < 0.05).

**Supplementary Figure S4.** The *miR399d-OX* genetic background has a significant effect on the abundance of a number of TAG species, although total TAG content is not significantly affected.

T-test p-values between wild type and *miR399d-OX* plants at 0mM Pi (-P) and 3mM Pi (+P) (A). Relative abundance of TAG species: wild type (gray), *miR399d-OX* (dark red) (B). Significant changes (p-value < 0.05) are highlighted with stars.

**A.** wt vs. *miRNA399d OX*

|          | -P      | +P      |
|----------|---------|---------|
| TAG 48:1 | 0.262   | 0.653   |
| TAG 48:2 | 0.334   | 0.857   |
| TAG 48:3 | 0.507   | 0.918   |
| TAG 50:0 | 0.188   | 0.265   |
| TAG 50:1 | 0.319   | 0.445   |
| TAG 50:2 | 0.379   | 0.331   |
| TAG 50:3 | 0.575   | 0.179   |
| TAG 50:4 | 0.445   | 0.072   |
| TAG 50:5 | 0.513   | * 0.039 |
| TAG 50:6 | 0.580   | * 0.046 |
| TAG 50:7 | 0.253   | 0.055   |
| TAG 52:0 | 0.456   | 0.103   |
| TAG 52:1 | 0.200   | 0.427   |
| TAG 52:2 | 0.195   | 0.424   |
| TAG 52:3 | 0.299   | 0.296   |
| TAG 52:4 | 0.399   | 0.095   |
| TAG 52:5 | 0.517   | * 0.044 |
| TAG 52:6 | 0.538   | 0.025   |
| TAG 52:7 | 0.398   | * 0.019 |
| TAG 52:9 | 0.642   | * 0.001 |
| TAG 54:0 | 0.192   | 0.077   |
| TAG 54:1 | 0.077   | 0.447   |
| TAG 54:2 | 0.075   | 0.442   |
| TAG 54:3 | 0.065   | 0.429   |
| TAG 54:4 | 0.110   | 0.386   |
| TAG 54:5 | 0.226   | 0.142   |
| TAG 54:6 | 0.348   | * 0.021 |
| TAG 54:7 | 0.352   | * 0.005 |
| TAG 54:8 | 0.510   | * 0.006 |
| TAG 54:9 | 0.569   | * 0.018 |
| TAG 56:0 | 0.520   | 0.821   |
| TAG 56:1 | 0.130   | 0.415   |
| TAG 56:2 | 0.126   | 0.413   |
| TAG 56:3 | 0.071   | 0.431   |
| TAG 56:4 | 0.057   | 0.430   |
| TAG 56:5 | 0.061   | 0.420   |
| TAG 56:6 | * 0.049 | 0.447   |
| TAG 56:7 | * 0.047 | 0.461   |
| TAG 56:8 | 0.179   | 0.331   |
| TAG 56:9 | 0.290   | 0.309   |
| TAG 58:0 | 0.859   | 0.057   |
| TAG 58:1 | 0.271   | 0.323   |
| TAG 58:2 | 0.169   | 0.417   |
| TAG 58:3 | 0.098   | 0.434   |
| TAG 58:4 | 0.088   | 0.454   |
| TAG 58:5 | 0.209   | 0.473   |
| TAG 58:6 | 0.221   | 0.476   |
| TAG 58:7 | 0.052   | 0.572   |
| TAG 58:8 | 0.062   | 0.612   |
| TAG 58:9 | 0.151   | 0.801   |
| TAG 60:1 | 0.250   | 0.380   |
| TAG 60:2 | 0.224   | 0.372   |
| TAG 60:3 | 0.170   | 0.434   |
| TAG 60:4 | 0.133   | 0.438   |
| TAG 60:5 | 0.216   | 0.451   |
| TAG 60:6 | 0.344   | 0.214   |
| TAG 60:7 | 0.345   | 0.095   |

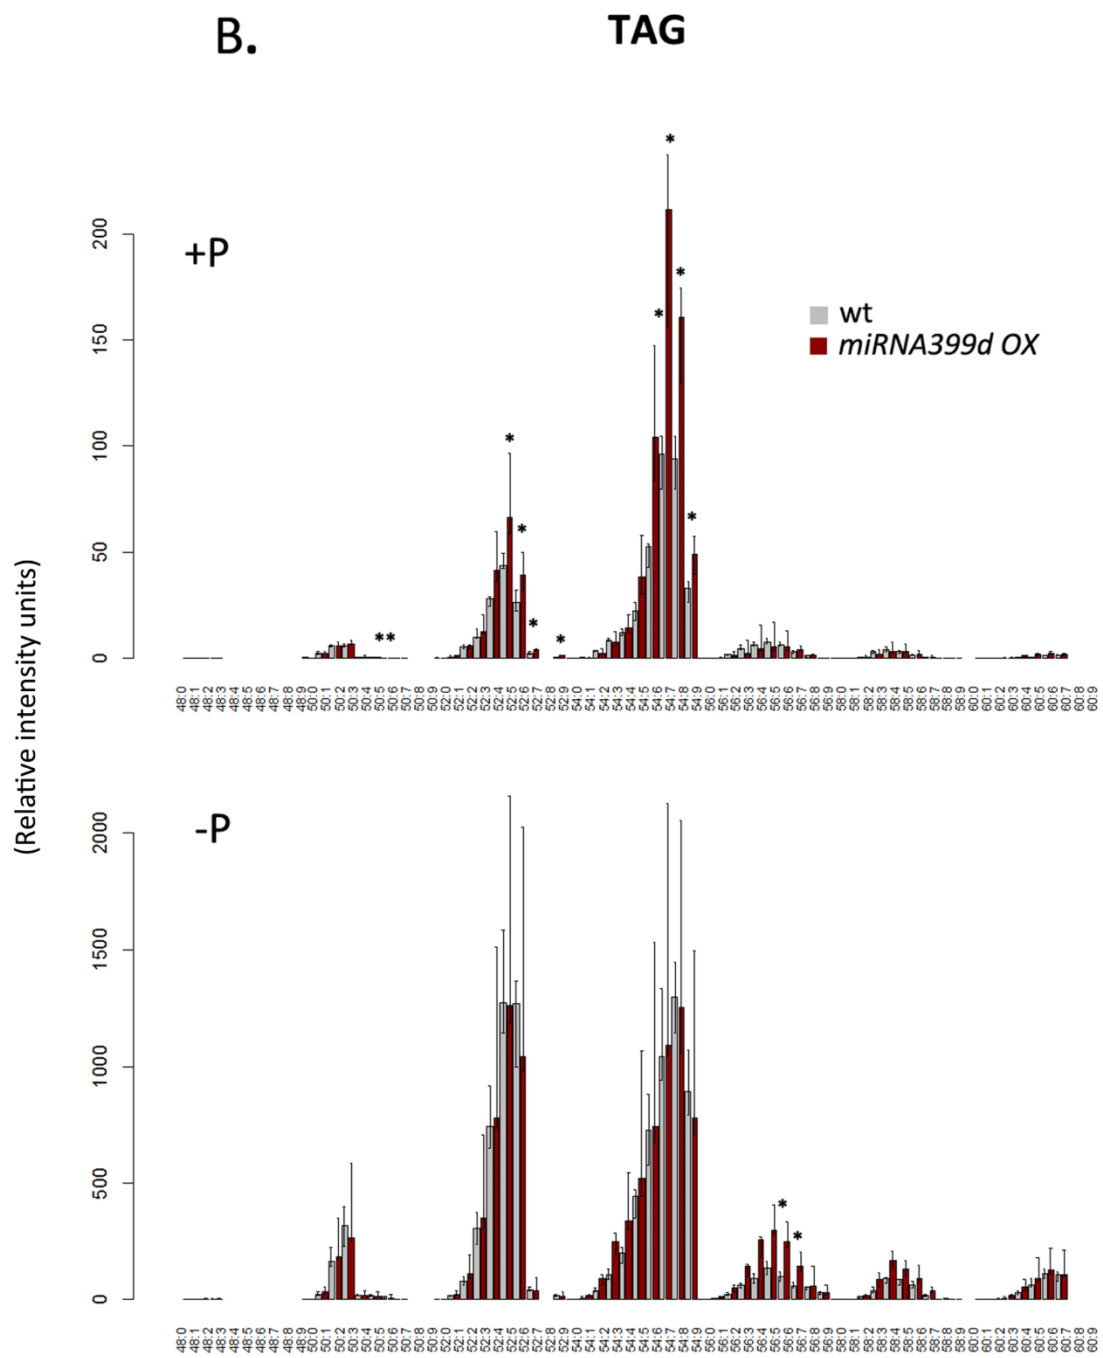

### Supplementary Table S1. Fragmentation of 52-C and 54-C TAG species.

With the aim of exploring the composition of the most abundant TAG acyl groups, the masses of TAG fragments of 30 to 46 acyl carbons, with 0 to 6 saturations, were queried to TAG species MSMS spectra. The hits shown in the table had a maximum retention time (RT) difference of  $\pm 0.01$  min to the TAG species fragmented. For 52-C species there were only 34-C and 36-C fragments, implying 18-C and 16-C losses. It is well known that the bulk of PC and DAG, TAG precursor classes, contains either 34 or 36 acyl carbons, with a composition of 18-C + 16-C and 18-C + 18-C fatty acids, respectively (Browse and Somerville 1991). As only 16-C or 18-C fatty acid losses could be detected, the composition of 52-C TAG can be deduced as 18-C + 18-C + 16-C.

| TAG species | formula   | m/z (M + NH <sub>4</sub> ) | RT      | TAG fragment | formula  | m/z (M + H) | RT      | Predicted loss |
|-------------|-----------|----------------------------|---------|--------------|----------|-------------|---------|----------------|
| 52:0        | C55H106O6 | 880.8347                   | 15.8050 | 34:0         | C37H70O4 | 579.5324    | 15.7979 | 18:0           |
| 52:1        | C55H104O6 | 878.8105                   | 15.3403 | 34:0         | C37H70O4 | 579.5327    | 15.3352 | 18:1           |
| 52:1        | C55H104O6 | 878.8105                   | 15.3403 | 34:1         | C37H68O4 | 577.5188    | 15.3371 | 18:0           |
| 52:2        | C55H102O6 | 876.8018                   | 15.3429 | 34:0         | C37H70O4 | 579.5327    | 15.3352 | 18:2           |
| 52:2        | C55H102O6 | 876.8018                   | 15.3429 | 34:1         | C37H68O4 | 577.5188    | 15.3371 | 18:1           |
| 52:2        | C55H102O6 | 876.8018                   | 15.3429 | 34:2         | C37H66O4 | 575.5029    | 15.3440 | 18:0           |
| 52:3        | C55H100O6 | 874.7854                   | 15.0890 | 34:0         | C37H70O4 | 579.5327    | 15.0858 | 18:3           |
| 52:3        | C55H100O6 | 874.7854                   | 15.0890 | 34:1         | C37H68O4 | 577.5179    | 15.0816 | 18:2           |
| 52:3        | C55H100O6 | 874.7854                   | 15.0890 | 34:3         | C37H64O4 | 573.4876    | 15.0909 | 18:0           |
| 52:3        | C55H100O6 | 874.7854                   | 15.0890 | 36:3         | C39H68O4 | 601.5188    | 15.0986 | 16:0           |
| 52:4        | C55H98O6  | 872.7701                   | 14.8094 | 34:1         | C37H68O4 | 577.5174    | 14.8149 | 18:3           |
| 52:4        | C55H98O6  | 872.7701                   | 14.8094 | 34:2         | C37H66O4 | 575.5028    | 14.8036 | 18:2           |
| 52:5        | C55H96O6  | 870.7544                   | 14.5049 | 34:2         | C37H66O4 | 575.5029    | 14.5042 | 18:3           |
| 52:5        | C55H96O6  | 870.7544                   | 14.5049 | 34:3         | C37H64O4 | 573.4875    | 14.5038 | 18:2           |
| 52:6        | C55H94O6  | 868.7390                   | 14.1696 | 34:3         | C37H64O4 | 573.4875    | 14.1696 | 18:3           |
| 52:6        | C55H94O6  | 868.7390                   | 14.1696 | 34:4         | C37H62O4 | 571.4718    | 14.1700 | 18:2           |
| 52:7        | C55H92O6  | 866.7237                   | 13.7994 | 34:4         | C37H62O4 | 571.4721    | 13.7918 | 18:3           |
| 52:7        | C55H92O6  | 866.7237                   | 13.7994 | 34:5         | C37H60O4 | 569.4573    | 13.8007 | 18:2           |
| 52:9        | C55H88O6  | 862.6936                   | 12.8072 | 34:6         | C37H58O4 | 567.4408    | 12.8145 | 18:3           |
| 52:9        | C55H88O6  | 862.6936                   | 12.8072 | 36:6         | C39H62O4 | 595.4718    | 12.8154 | 16:3           |
| 54:1        | C57H108O6 | 906.8403                   | 15.5859 | 36:0         | C39H74O4 | 607.5652    | 15.5873 | 18:1           |
| 54:1        | C57H108O6 | 906.8403                   | 15.5859 | 36:1         | C39H72O4 | 605.5495    | 15.5824 | 18:0           |
| 54:2        | C57H106O6 | 904.8335                   | 15.5894 | 34:2         | C37H66O4 | 575.5022    | 15.5983 | 20:0           |
| 54:2        | C57H106O6 | 904.8335                   | 15.5894 | 36:0         | C39H74O4 | 607.5652    | 15.5873 | 18:2           |
| 54:2        | C57H106O6 | 904.8335                   | 15.5894 | 36:1         | C39H72O4 | 605.5495    | 15.5824 | 18:1           |
| 54:2        | C57H106O6 | 904.8335                   | 15.5894 | 36:2         | C39H70O4 | 603.5342    | 15.5890 | 18:0           |
| 54:3        | C57H104O6 | 902.8173                   | 15.3651 | 34:3         | C37H64O4 | 573.4876    | 15.3732 | 20:0           |
| 54:3        | C57H104O6 | 902.8173                   | 15.3651 | 36:0         | C39H74O4 | 607.5650    | 15.3635 | 18:3           |
| 54:3        | C57H104O6 | 902.8173                   | 15.3651 | 36:1         | C39H72O4 | 605.5485    | 15.3561 | 18:2           |
| 54:3        | C57H104O6 | 902.8173                   | 15.3651 | 36:2         | C39H70O4 | 603.5345    | 15.3589 | 18:1           |
| 54:3        | C57H104O6 | 902.8173                   | 15.3651 | 36:3         | C39H68O4 | 601.5185    | 15.3624 | 18:0           |
| 54:4        | C57H102O6 | 900.8012                   | 15.1174 | 36:1         | C39H72O4 | 605.5488    | 15.1106 | 18:3           |
| 54:4        | C57H102O6 | 900.8012                   | 15.1174 | 36:2         | C39H70O4 | 603.5334    | 15.1104 | 18:2           |
| 54:4        | C57H102O6 | 900.8012                   | 15.1174 | 36:4         | C39H66O4 | 599.5030    | 15.1192 | 18:0           |
| 54:5        | C57H100O6 | 898.7859                   | 14.8508 | 36:2         | C39H70O4 | 603.5334    | 14.8536 | 18:3           |
| 54:5        | C57H100O6 | 898.7859                   | 14.8508 | 36:3         | C39H68O4 | 601.5176    | 14.8441 | 18:2           |
| 54:5        | C57H100O6 | 898.7859                   | 14.8508 | 36:5         | C39H64O4 | 597.4879    | 14.8553 | 18:0           |
| 54:6        | C57H98O6  | 896.7697                   | 14.5520 | 36:3         | C39H68O4 | 601.5182    | 14.5559 | 18:3           |
| 54:6        | C57H98O6  | 896.7697                   | 14.5520 | 36:6         | C39H62O4 | 595.4717    | 14.5567 | 18:0           |
| 54:7        | C57H96O6  | 894.7540                   | 14.2153 | 36:4         | C39H66O4 | 599.5028    | 14.2177 | 18:3           |
| 54:7        | C57H96O6  | 894.7540                   | 14.2153 | 36:5         | C39H64O4 | 597.4872    | 14.2097 | 18:2           |
| 54:8        | C57H94O6  | 892.7389                   | 13.8402 | 36:5         | C39H64O4 | 597.4873    | 13.8433 | 18:3           |
| 54:8        | C57H94O6  | 892.7389                   | 13.8402 | 36:6         | C39H62O4 | 595.4719    | 13.8439 | 18:2           |
| 54:9        | C57H92O6  | 890.7234                   | 13.4045 | 36:6         | C39H62O4 | 595.4721    | 13.4048 | 18:3           |

**Supplementary Table S2.** Effect of P starvation and different genetic backgrounds (*phr1*, *pho2* and *miR399d-OX*) on the expression of lipid remodeling genes, transcription factors and genes involved in TAG accumulation.

Values are log<sub>2</sub>-transformed fold changes between two conditions/genotypes. These ratios were calculated from average expression levels (two technical and two biological replicates) of 40-ΔCTs. Significant changes (T-test p-value < 0.05) are denoted with stars.

|                                    |                | Shoots          |                          |                          |                             | Roots           |                          |                          |                             |         |
|------------------------------------|----------------|-----------------|--------------------------|--------------------------|-----------------------------|-----------------|--------------------------|--------------------------|-----------------------------|---------|
|                                    |                | wt -P vs. wt +P | <i>phr1</i> -P vs. wt -P | <i>pho2</i> +P vs. wt +P | <i>miR399d-OX</i> vs. wt +P | wt -P vs. wt +P | <i>phr1</i> -P vs. wt -P | <i>pho2</i> +P vs. wt +P | <i>miR399d-OX</i> vs. wt +P |         |
| Lipid remodeling genes             | <i>PLDZ1</i>   | AT3G16785       | 0.41                     | -0.02                    | 0.38                        | 0.14            | 0.01                     | * -0.63                  | 0.07                        | -0.11   |
|                                    | <i>PLDZ2</i>   | AT3G05630       | * 4.69                   | * -1.45                  | -0.05                       | 0.18            | * 3.15                   | * -2.22                  | 0.40                        | 0.17    |
|                                    | <i>NPC4</i>    | AT3G03530       | * 8.47                   | * -3.56                  | * 0.51                      | -0.03           | * 2.37                   | * -3.55                  | 0.14                        | -0.05   |
|                                    | <i>NPC5</i>    | AT3G03540       | * 9.73                   | * -1.18                  | * 1.18                      | * 1.89          | * 2.34                   | * -3.32                  | 0.12                        | * 0.65  |
|                                    | <i>PAH1</i>    | AT3G09560       | * 3.01                   | * -1.04                  | -0.03                       | 0.01            | * 1.86                   | * -2.05                  | 0.15                        | -0.23   |
|                                    | <i>PAH2</i>    | AT5G42870       | * 0.89                   | * -0.54                  | 0.17                        | 0.18            | 0.10                     | * -0.55                  | -0.10                       | -0.20   |
|                                    | <i>PLA2A</i>   | AT2G26560       | * 1.87                   | -0.35                    | * 0.89                      | * 1.68          | * 1.21                   | * -0.76                  | -0.05                       | * 0.90  |
|                                    | <i>GDPD5</i>   | AT1G74210       | * 2.98                   | * -1.43                  | -0.10                       | 0.29            | * 0.92                   | * -1.41                  | 0.28                        | -0.34   |
|                                    | <i>GDPD6</i>   | AT5G08030       | * 10.53                  | * -5.57                  | 0.19                        | -0.11           | * 2.76                   | * -3.88                  | -0.08                       | * -0.53 |
|                                    | <i>MGD2</i>    | AT5G20410       | * 5.20                   | * -1.59                  | 0.06                        | -0.49           | * 2.06                   | * -2.89                  | 0.44                        | * -1.03 |
|                                    | <i>MGD3</i>    | AT2G11810       | * 5.35                   | * -1.04                  | -0.20                       | * -1.30         | * 4.50                   | * -3.50                  | * 1.07                      | * -0.60 |
|                                    | <i>DGD1</i>    | AT3G11670       | * 1.32                   | -0.37                    | -0.04                       | -0.21           | * 0.79                   | * -0.81                  | 0.11                        | -0.28   |
|                                    | <i>DGD2</i>    | AT4G00550       | * 2.23                   | * -1.02                  | 0.10                        | 0.01            | * 1.50                   | * -1.86                  | 0.16                        | -0.39   |
|                                    | <i>SQD1</i>    | AT4G33030       | * 5.16                   | * -1.17                  | -0.12                       | -0.20           | * 3.00                   | * -1.06                  | * 0.75                      | 0.35    |
|                                    | <i>SQD2</i>    | AT5G01220       | * 5.65                   | * -2.10                  | -0.10                       | -0.05           | * 3.11                   | * -2.95                  | 0.35                        | -0.26   |
| Genes involved in TAG accumulation | <i>DGAT1</i>   | AT2G19450       | 0.36                     | 0.33                     | -0.15                       | 0.00            | -0.13                    | * -0.69                  | -0.10                       | -0.35   |
|                                    | <i>PDAT1</i>   | AT5G13640       | 0.50                     | 0.17                     | -0.02                       | -0.16           | -0.20                    | * -0.54                  | 0.05                        | -0.49   |
|                                    | <i>ROD1</i>    | AT3G15820       | 0.22                     | -0.04                    | -0.16                       | 0.08            | -0.35                    | * -0.69                  | 0.02                        | * -0.70 |
|                                    | <i>LPCAT2</i>  | AT1G63050       | * -0.54                  | * 0.97                   | -0.27                       | 0.06            | -0.41                    | * -0.58                  | 0.09                        | -0.44   |
|                                    | <i>BCCP2</i>   | AT5G15530       | * -0.90                  | * 0.54                   | -0.20                       | * -0.63         | -0.37                    | * -1.59                  | 0.26                        | * -0.62 |
|                                    | <i>PDH-E1α</i> | AT1G01090       | -0.40                    | 0.21                     | 0.01                        | -0.19           | * -1.02                  | -0.46                    | -0.16                       | * -0.75 |
| Transcription factors              | <i>ABI4</i>    | AT2G40220       | * -1.92                  | * 5.70                   | * 0.73                      | * -0.56         | * -4.49                  | -0.48                    | * -3.97                     | * -4.52 |
|                                    | <i>MYB62</i>   | AT1G68320       | * 2.70                   | -0.13                    | 0.40                        | 0.34            | 0.16                     | * 2.68                   | * -1.20                     | * -0.86 |
|                                    | <i>WRKY75</i>  | AT5G13080       | -0.31                    | * 1.46                   | -0.40                       | * 1.06          | * 1.61                   | * 0.88                   | -0.11                       | 0.41    |
|                                    | <i>ZAT6</i>    | AT5G04340       | * -0.80                  | * -1.69                  | * -1.12                     | * -1.70         | -0.25                    | 0.08                     | * -1.37                     | * -0.79 |
|                                    | <i>UBQ10</i>   | AT4G05320       | 0.00                     | 0.00                     | 0.00                        | 0.00            | 0.00                     | 0.00                     | 0.00                        | 0.00    |

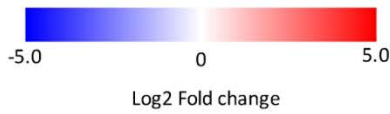

Supplement: supp_eru535_jexbot132878_file001.pdf [file supp_eru535_jexbot132878_file001.pdf]
